# Supplementary material for: Phytochemicals from Leucas zeylanica Targeting Main Protease of SARS-CoV-2: Chemical Profiles, Molecular Docking, and Molecular Dynamics Simulations
Source: MDPI journal article supplement (doi:10.3390/biology10080789), 2021-08-17
Supplement: s1 [file s1]

Supporting information

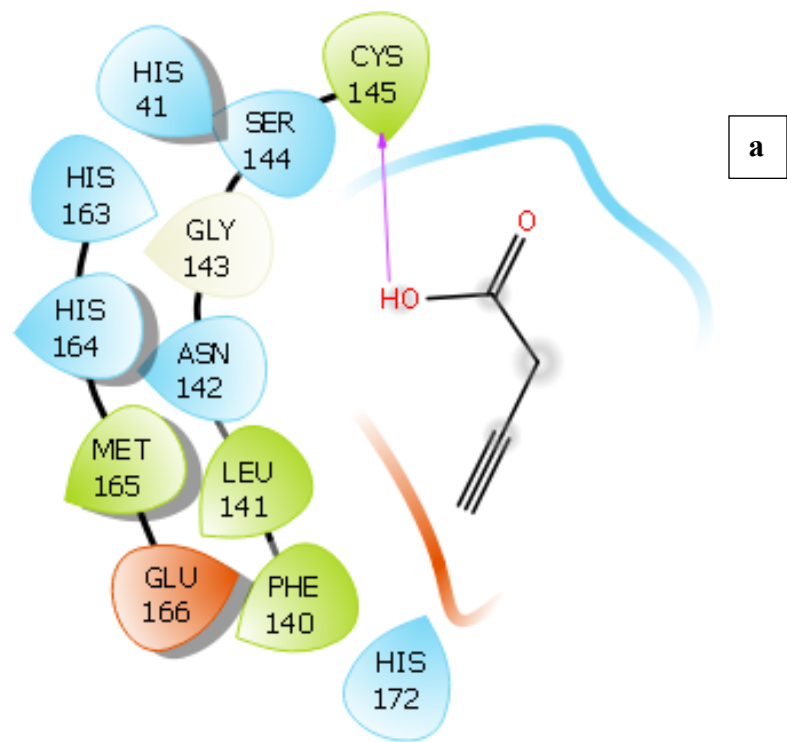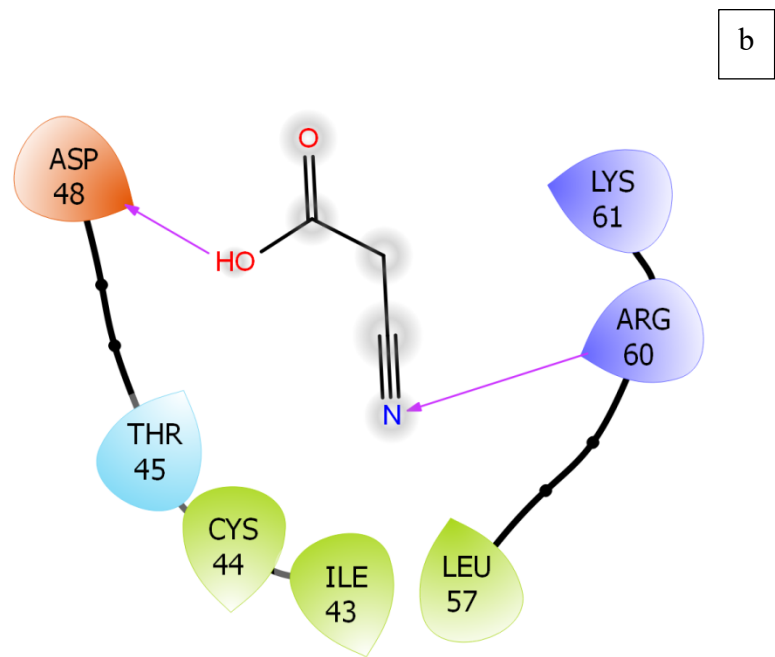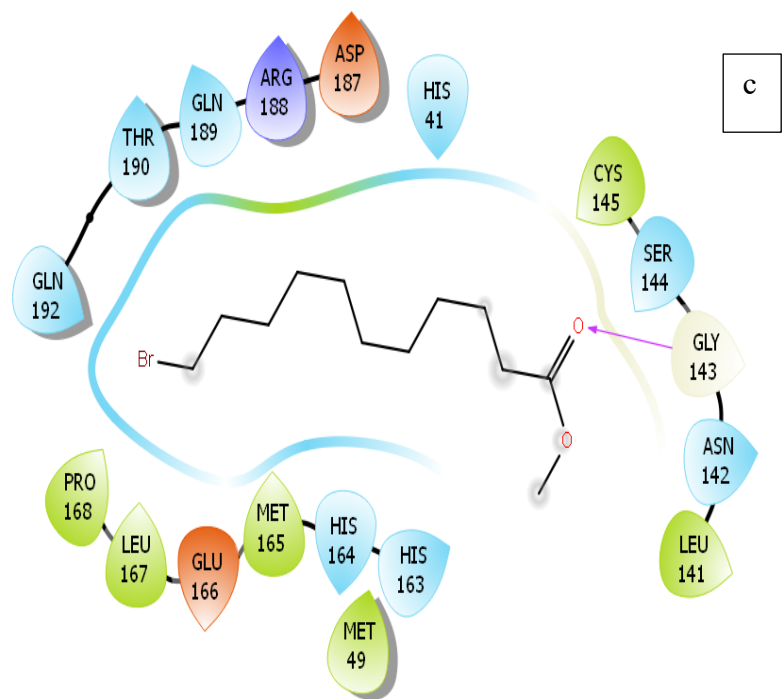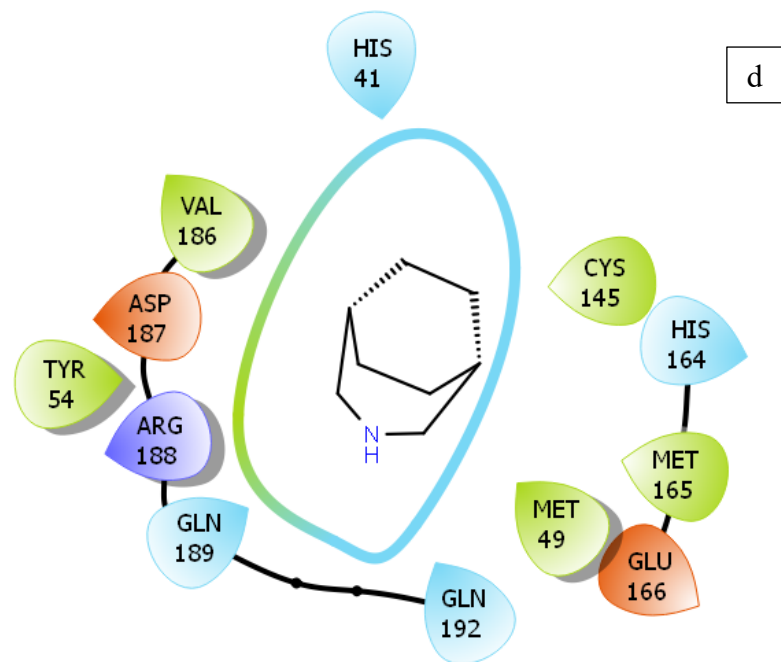

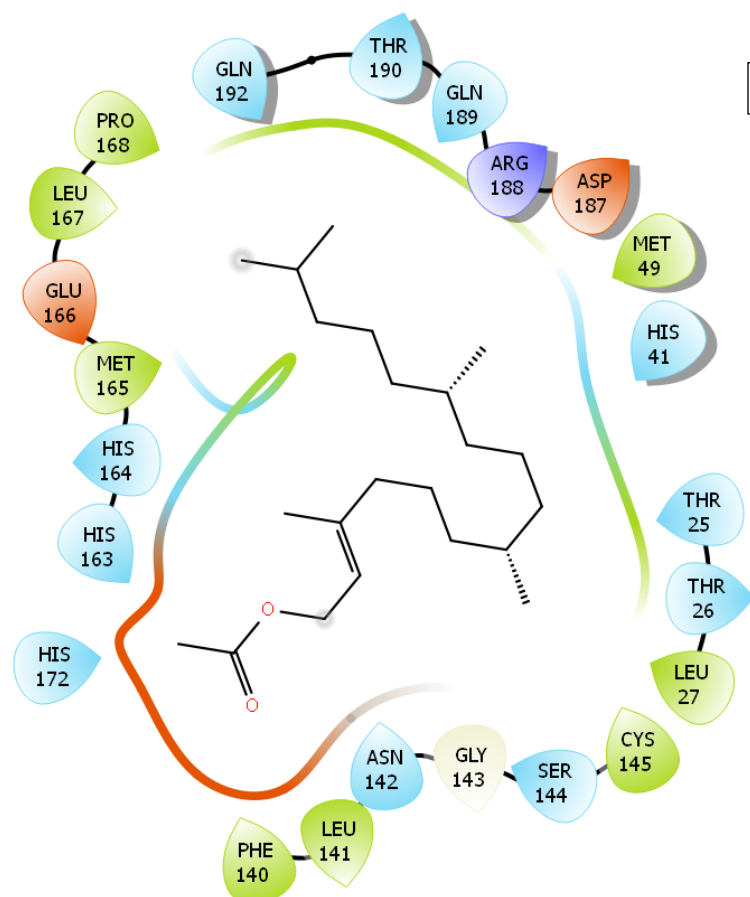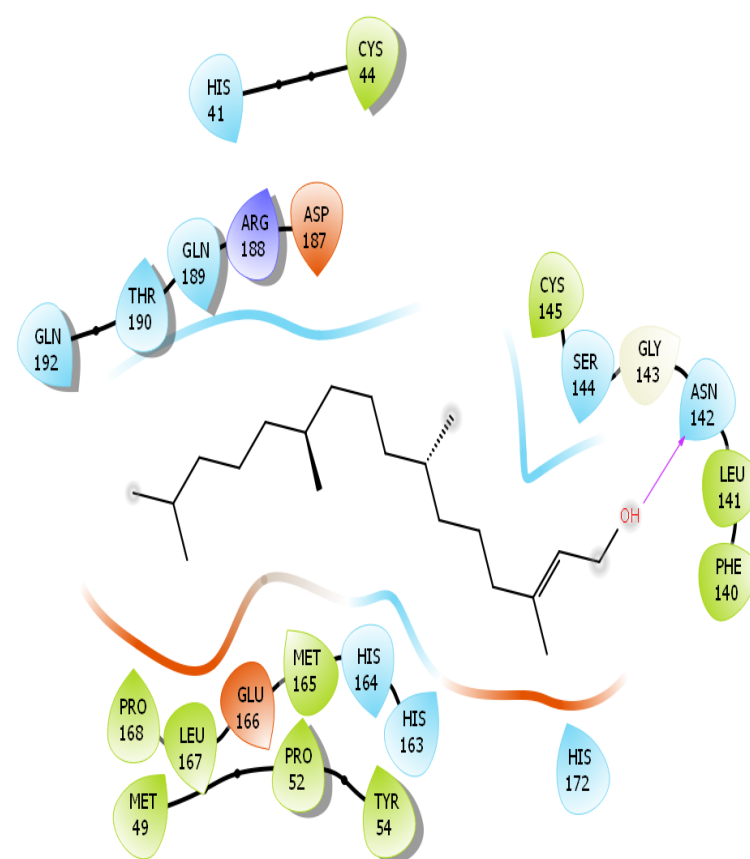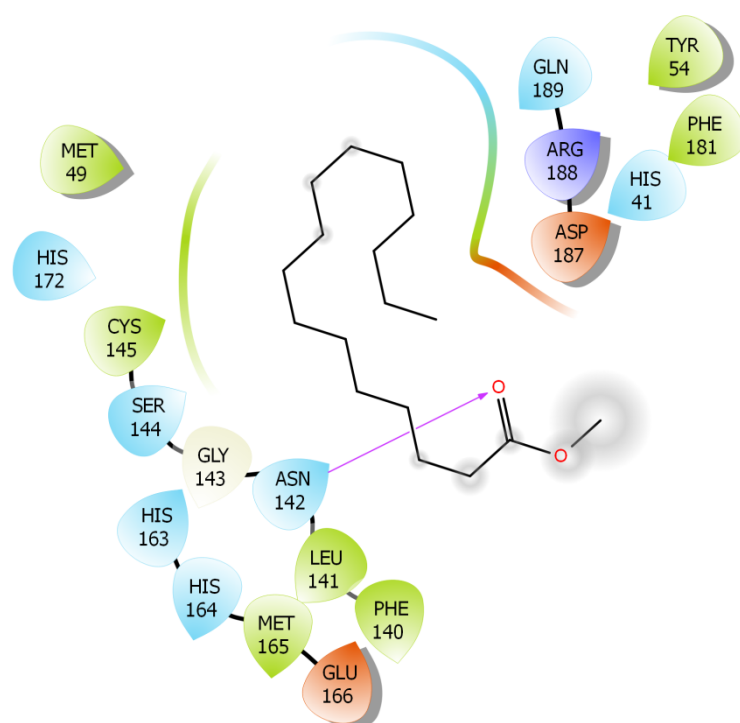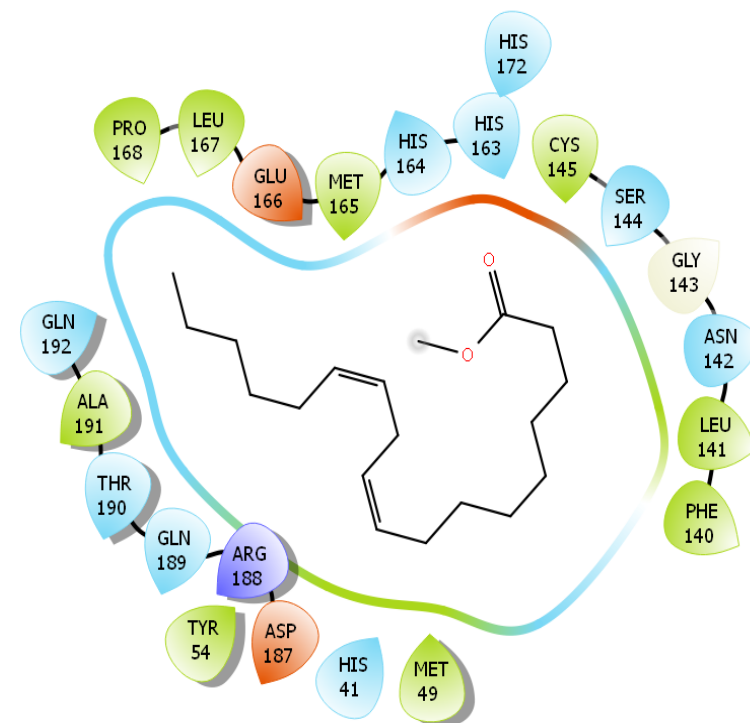

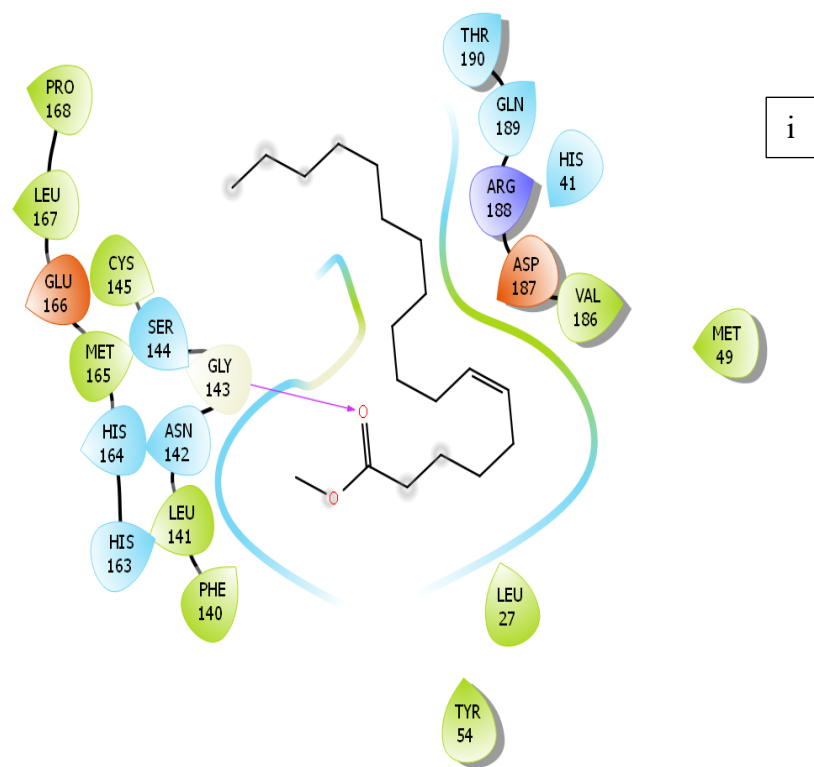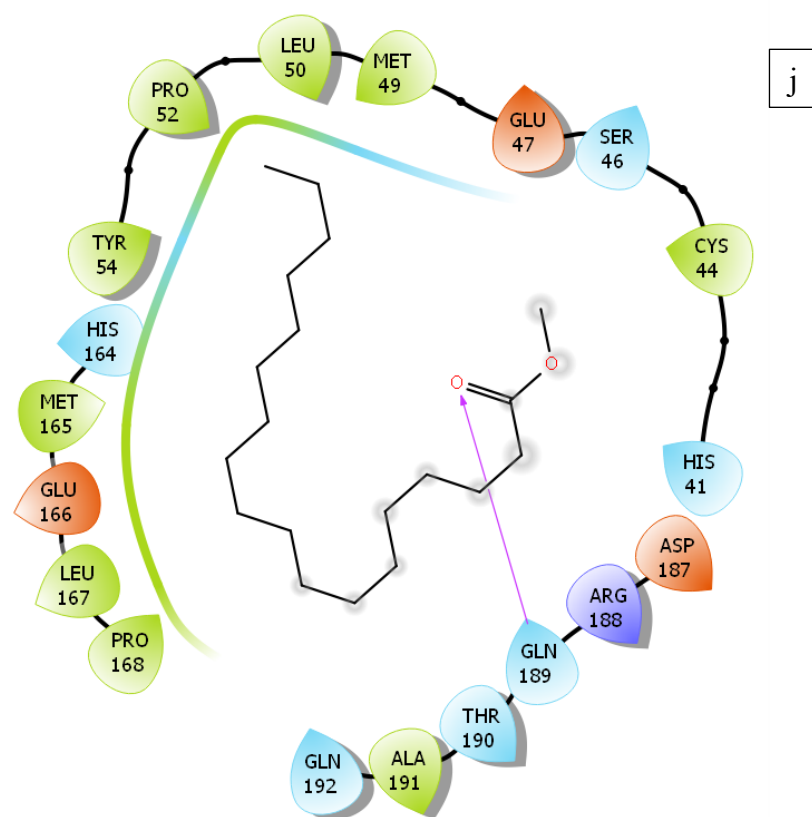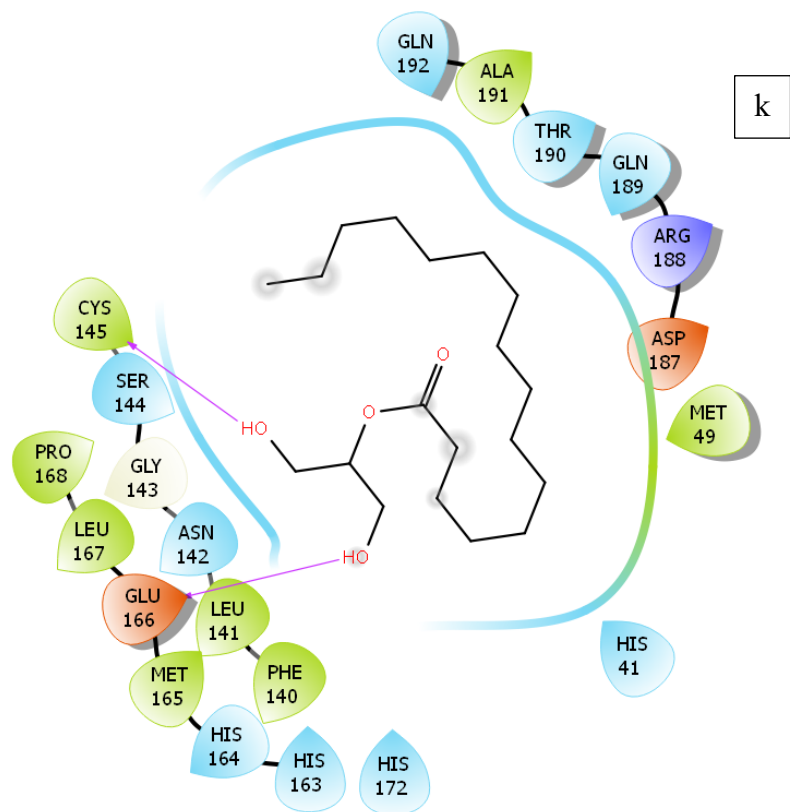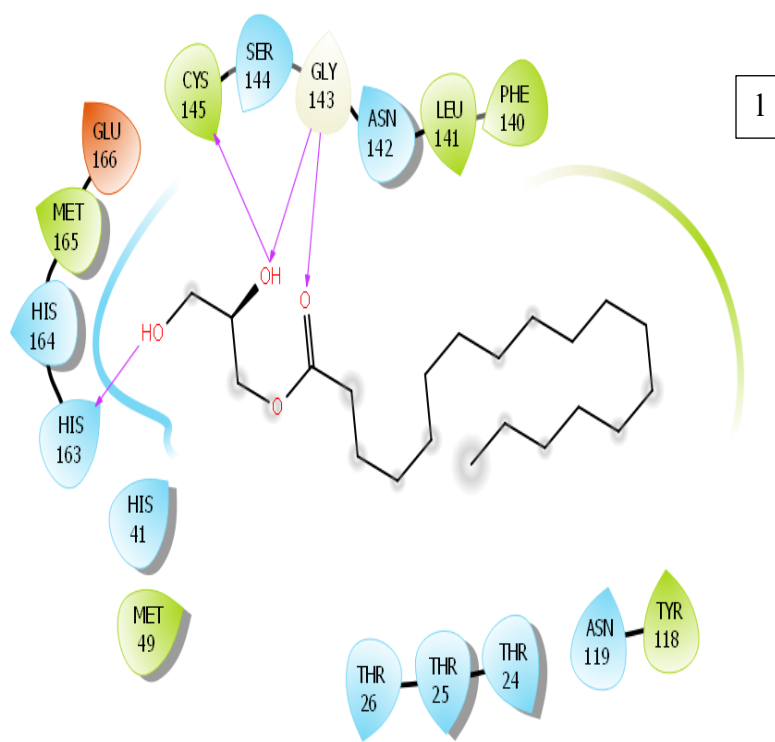

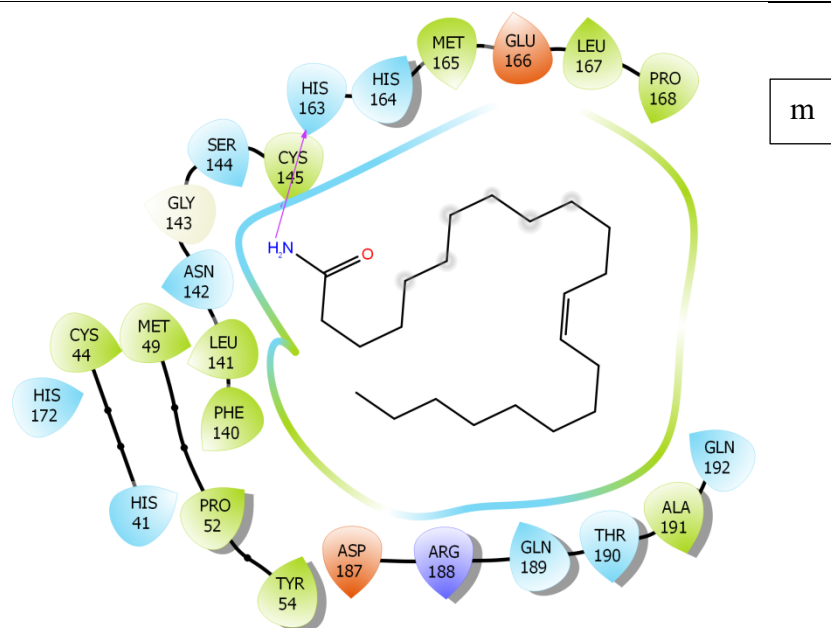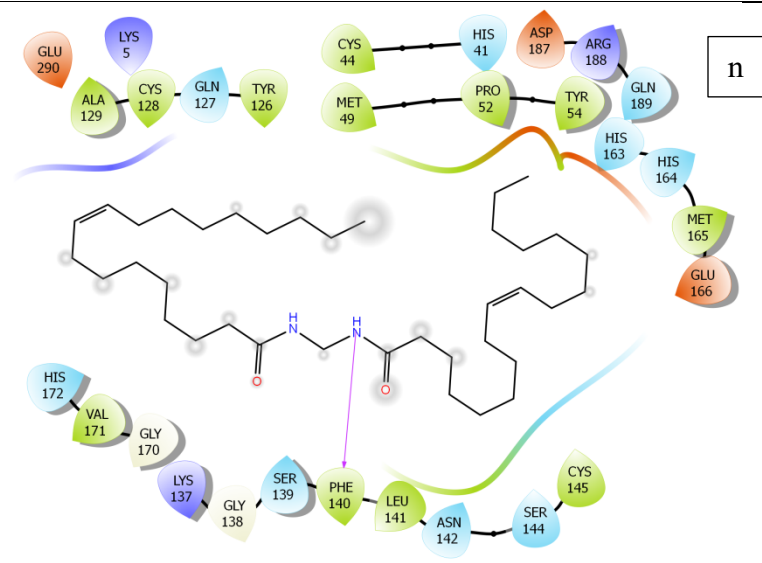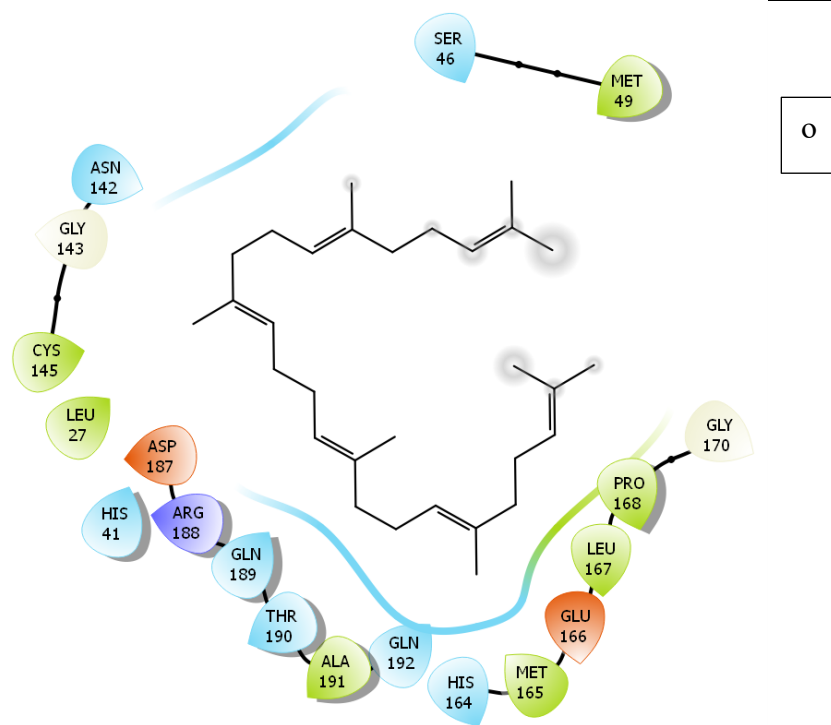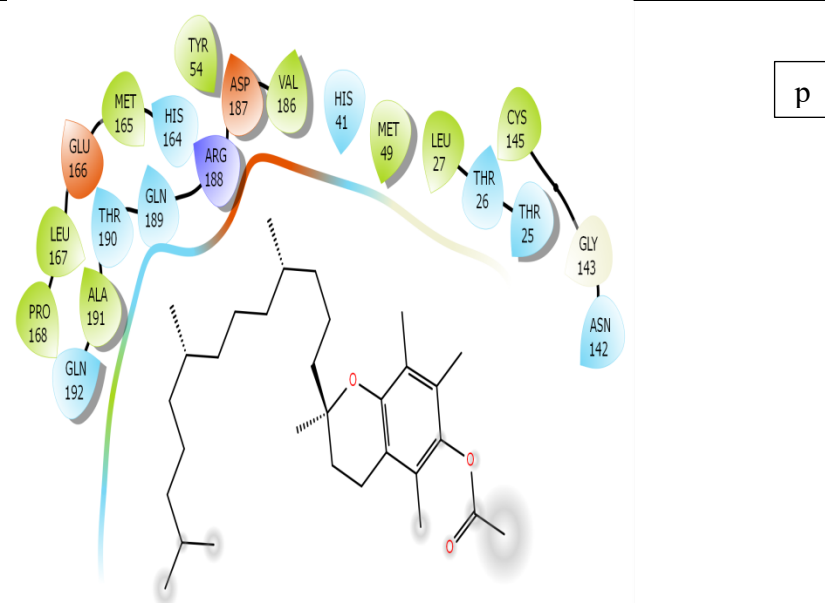

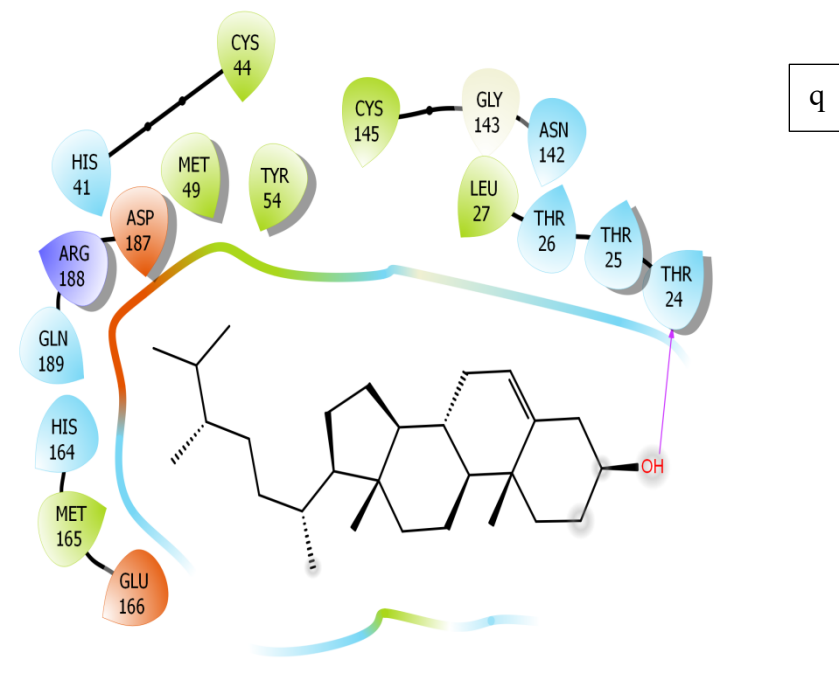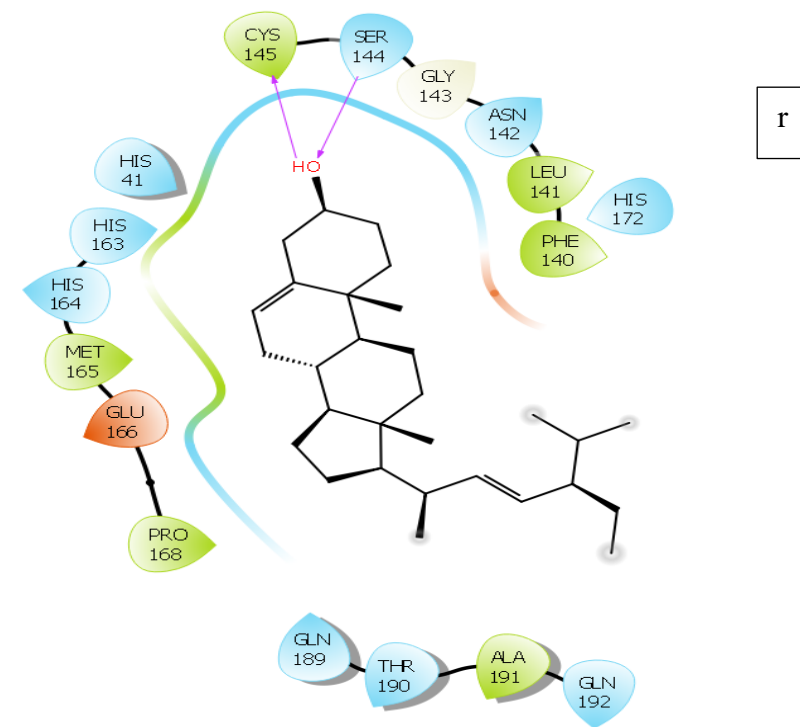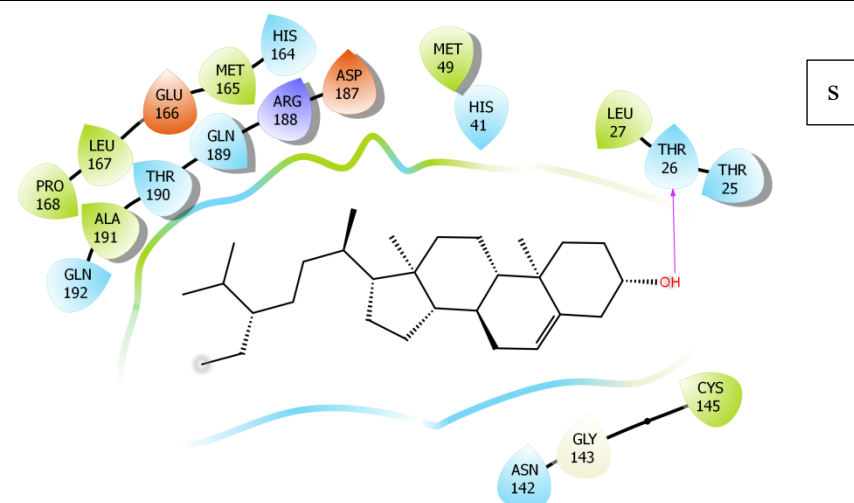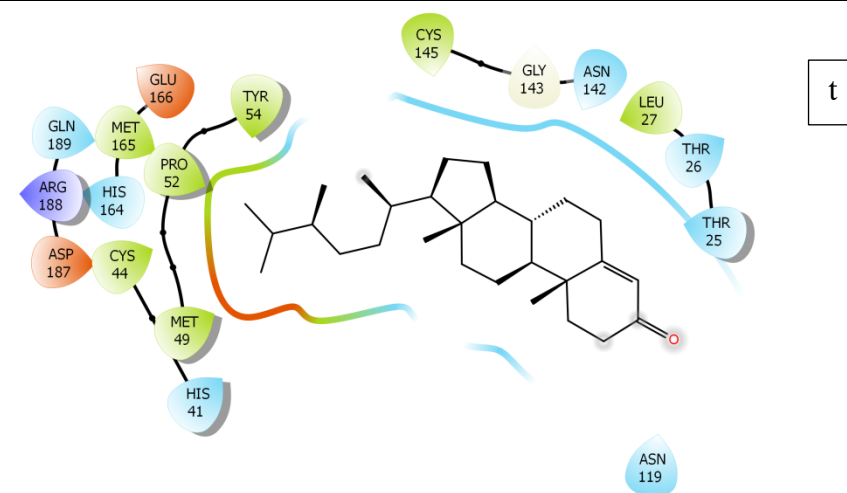



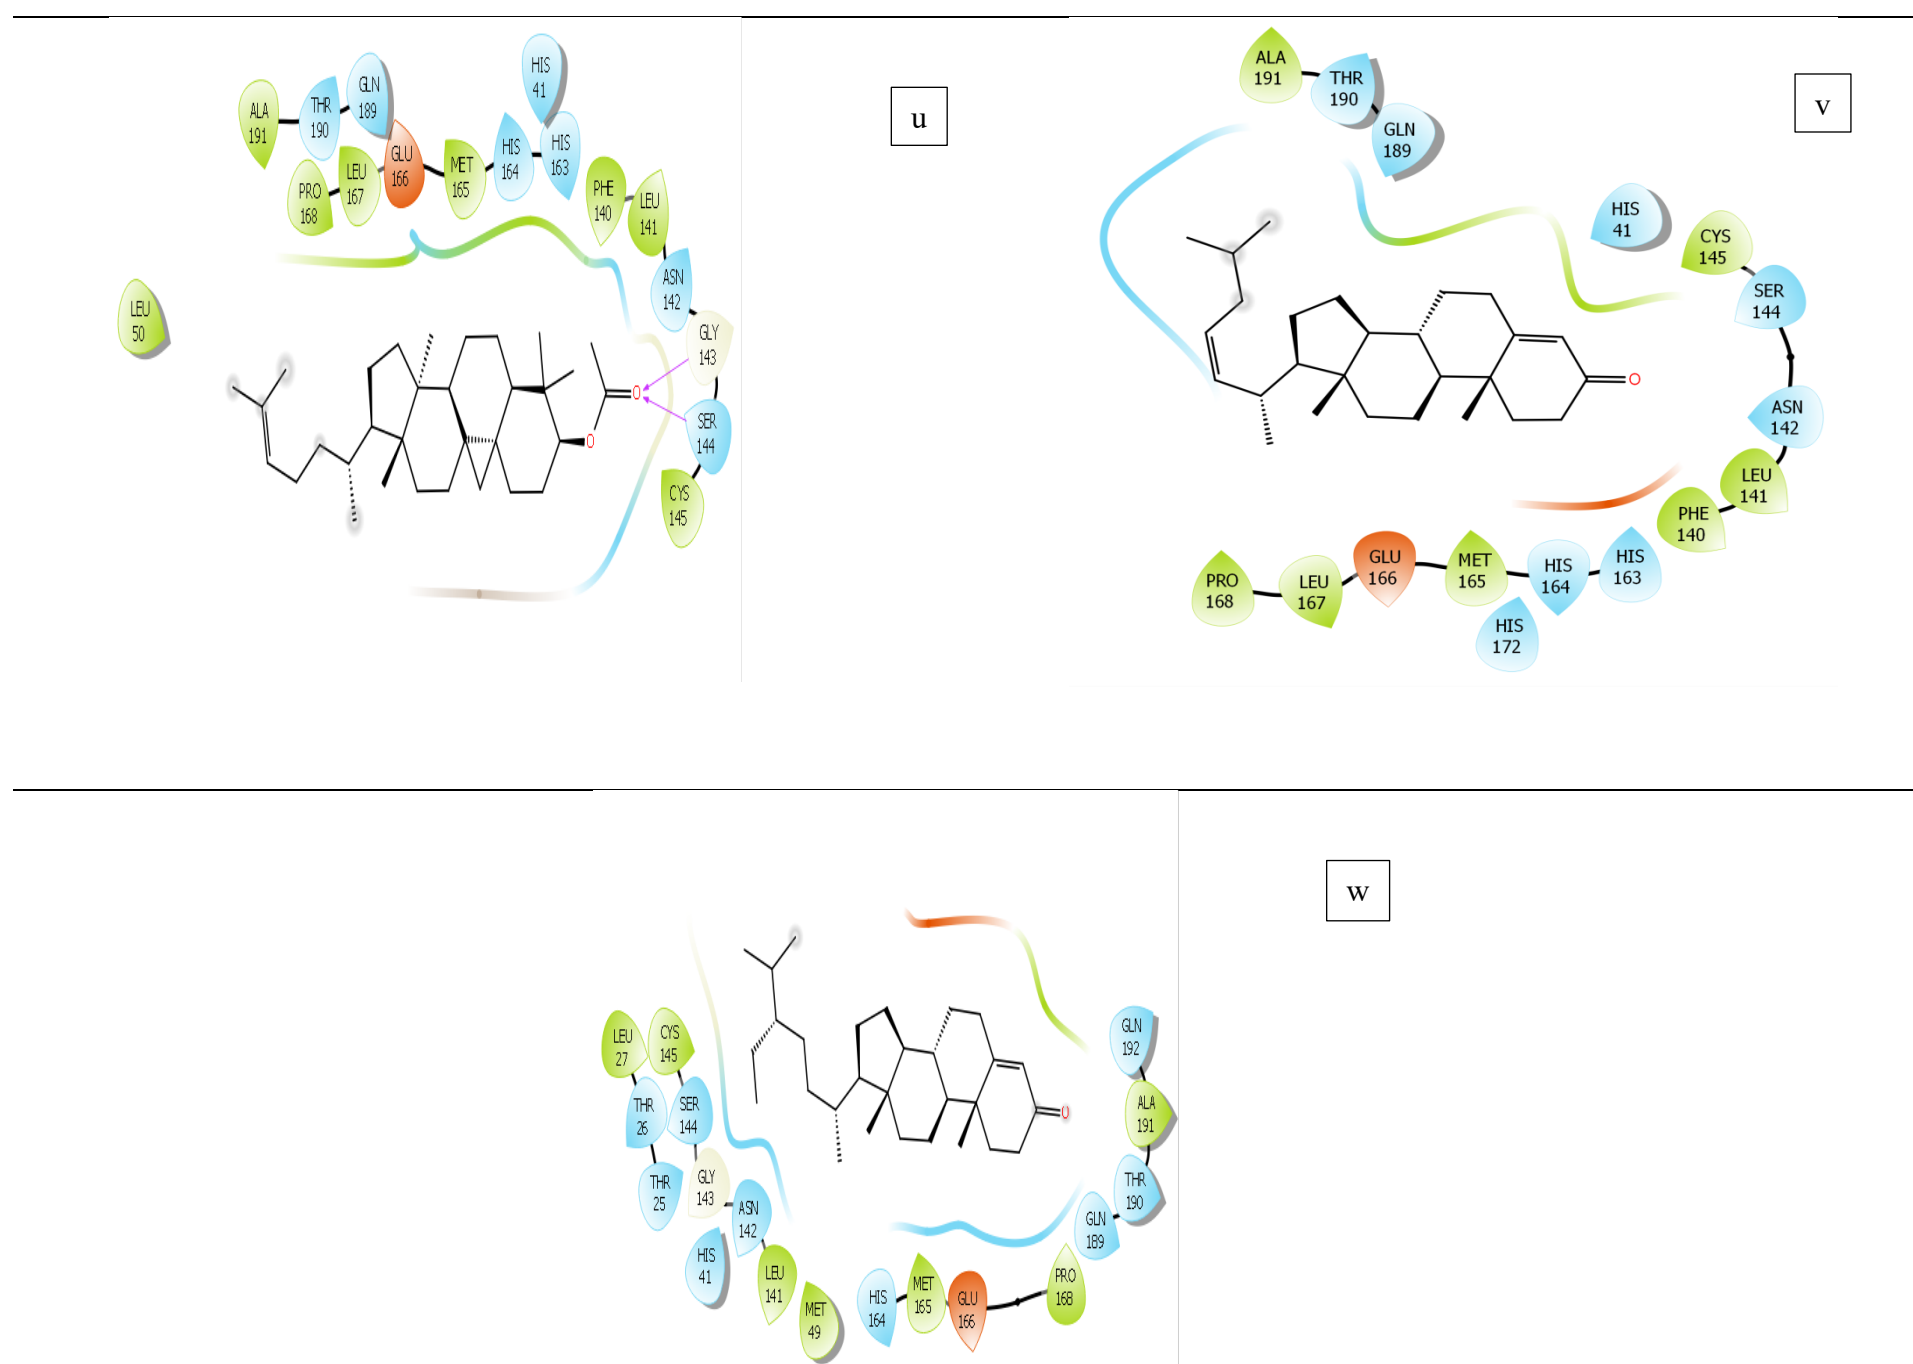

**Figure S1:** 2D representation of 23 compounds against the SARS-CoV-2 receptor (PDB: 6LU7). (a) 3-butynoic acid, (b) Acetic acid, cyano-, (c) Undecanoic acid, 11-bromo-, methyl ester, (d) 3-azabicyclo[3.2.2]nonane, (e) Phytol acetate, (f) 3,7,11,15-tetramethyl-2-hexadecen-1-ol, (g) Hexadecanoic acid, methyl ester, (h) 9,12-octadecadienoic acid (Z,Z)-, methyl ester, (i) 6-octadecenoic acid, methyl ester, (Z)-, (j) Methyl stearate, (k) Hexadecanoic acid, 2-hydroxy-1-(hydroxymethyl)ethyl ester, (l) Octadecanoic acid, 2,3-dihydroxypropyl ester, (m) 13-Docosenamide, (Z)-, (n) N,N'-Methylenebis(oleamide), (Z, Z)-, (o) Squalene, (p) alpha.-Tocopheryl acetate, (q) Campesterol, (r) Stigmasterol, (s) Gamma-sitosterol, (t) 4-campestene-3-one, (u) 9,19-cyclolanost-24-en-3-ol, acetate, (3.beta.), (v) 4,22-cholestadien-3-one, and (w) Stigmast-4-en-3-one.
